# Supplementary material for: A single electron nanomechanical Y-switch
Source: Royal Society of Chemistry journal article supplement (doi:10.1039/c4nr01298d), 2014-05-28
Supplement: c4nr01298d1.pdf [file c4nr01298d1.pdf]

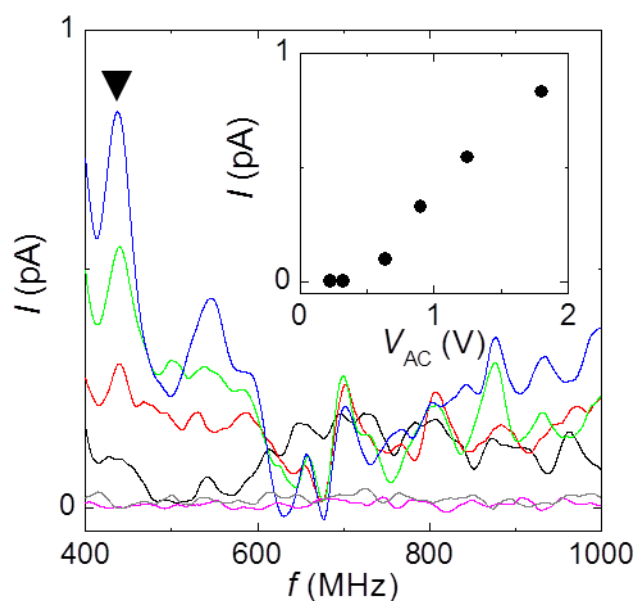

**Fig. S1.** The power dependence measurement of the current towards the electrode D1 at the input RF powers of 0, 3, 9, 12, 15, and 18 dBm. The inset shows the current at a specific resonance (indicated by a triangle in black). The threshold voltage is estimated to be around 0.5 V.
